# Supplementary material for: Sunlight-assisted synthesis of bimetallic silver–copper nanoparticles using peanut shell extract and its reusable activity against drug-resistant bacteria
Source: Royal Society of Chemistry journal article supplement (doi:10.1039/d4nj03882g), 2024-01-01
Supplement: d4nj03882g1.pdf [file d4nj03882g1.pdf]

Supporting information

**Sunlight assisted synthesis of bimetallic silver-copper nanoparticles using  
peanut shell extract and its reusable activity against drug-resistant bacteria**

S. Jayalakshmi<sup>a#</sup>, Dharshini Karnan Singaravelu<sup>a#</sup>, Mariappan Mariappan<sup>b</sup>, Fuad Ameen<sup>c</sup>,

Anbzhagan Veerappan<sup>a\*</sup>

<sup>a</sup>Department of Chemistry, School of Chemical and Biotechnology, SASTRA Deemed

University, Thanjavur – 613 401, Tamil Nadu, India

<sup>b</sup>Department of Chemistry, SRMIST, Kattankulathur, Chennai, Tamil Nadu, India

<sup>c</sup>Department of Botany and Microbiology, College of Science, King Saud University, Riyadh,

11451, Saudi Arabia.

Table S1: Phytochemical analysis

| <b>Phytochemical</b>       | <b>Assay</b>          | <b>Result</b>                                                                              |
|----------------------------|-----------------------|--------------------------------------------------------------------------------------------|
| Detection of carbohydrate  | Fehling's Test        | No colour change. Absence of carbohydrate                                                  |
| Detection of Flavonoids    | Alkaline Reagent Test | Yellow colour in an alkaline medium is decolourized by adding acid. Presence of flavonoids |
| Detection of Amino acids   | Ninhydrin test        | The formation of violet colour indicates the presence of amino acids                       |
| Detection of Protein       | Xanthoproteic test    | No white residue indicates the absence of proteins                                         |
| Detection for Tannins      | Lead acetate test     | Yellowish precipitate. Presence of tannins                                                 |
| Detection for Coumarins    | NaOH treatment        | Yellow colour formation indicates the presence of coumarins                                |
| Detection for Anthocyanins | Acid-base treatment   | The formation of pink-red turns blue indicates the presence of anthocyanins.               |
| Detection for Alkaloids    | Dragendroff test      | The formation of an orange precipitate indicates the presence of alkaloids                 |
| Detection for Emodins      | Ammonia-benzene       | No red colour, Absence of emodins                                                          |
| Detection for Saponins     | Foam test             | The formation of stable foam indicates the presence of saponins                            |
| Detection for Terpenoids   | Salkowski test        | No reddish colour. Absence of terpenoids                                                   |
| Detection of Polyphenol    | Ferric chloride test  | No bluish colour. Absence of polyphenols                                                   |

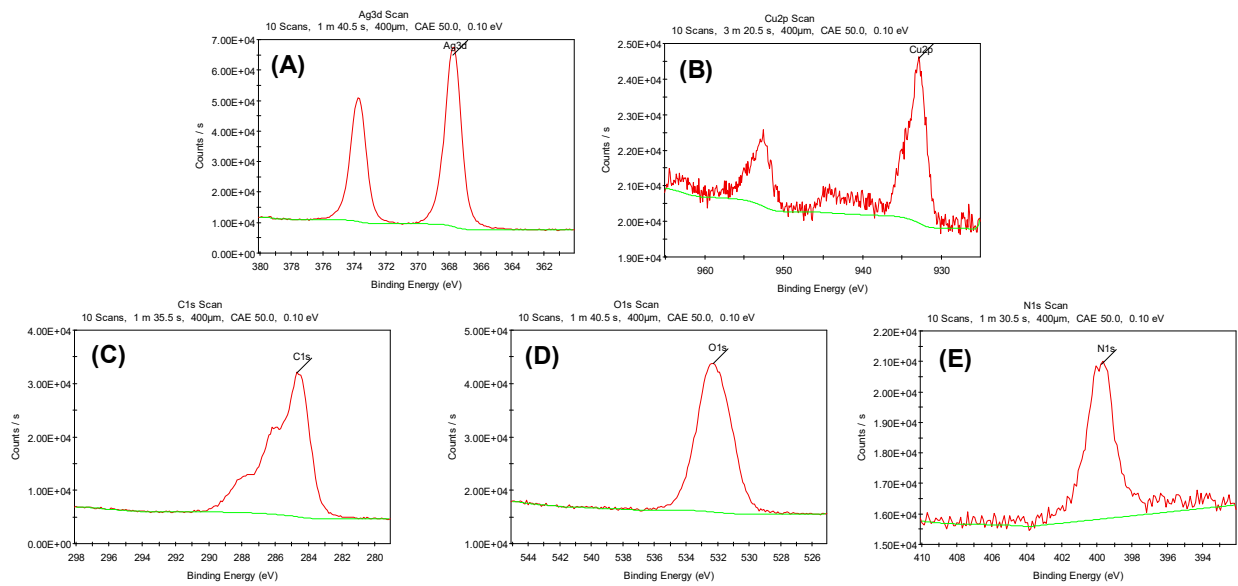

Figure S1: High resolution XPS of specific elements. (A) Ag3d of Ag-Cu NPs, (B) Cu2p of Ag-Cu NPs, (C) C1s of Ag-Cu NPs, (D) O1s of Ag-Cu NPs, and (E) N1s of Ag-Cu NPs.

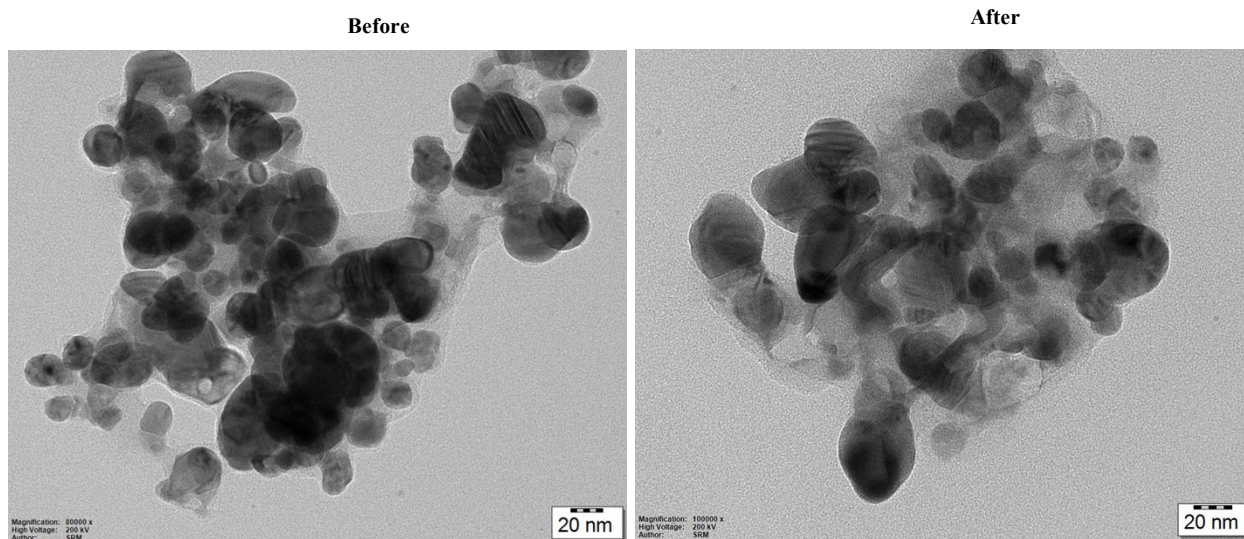

Figures S2: TEM images of Ag-Cu NPs before and after their use in bacterial treatment. It is noted that the NPs remains in nanoform and stable after being used in the treatment.
